# Supplementary material for: Differentially methylated CpGs in response to growth hormone administration in children with idiopathic short stature
Source: PubMed Central journal article supplement (PMC9118695; doi:10.1186/s13148-022-01281-z), 2022-05-18
Supplement: 13148_2022_1281_MOESM2_ESM.pdf [file 13148_2022_1281_MOESM2_ESM.pdf]

# Cluster Dendrogram

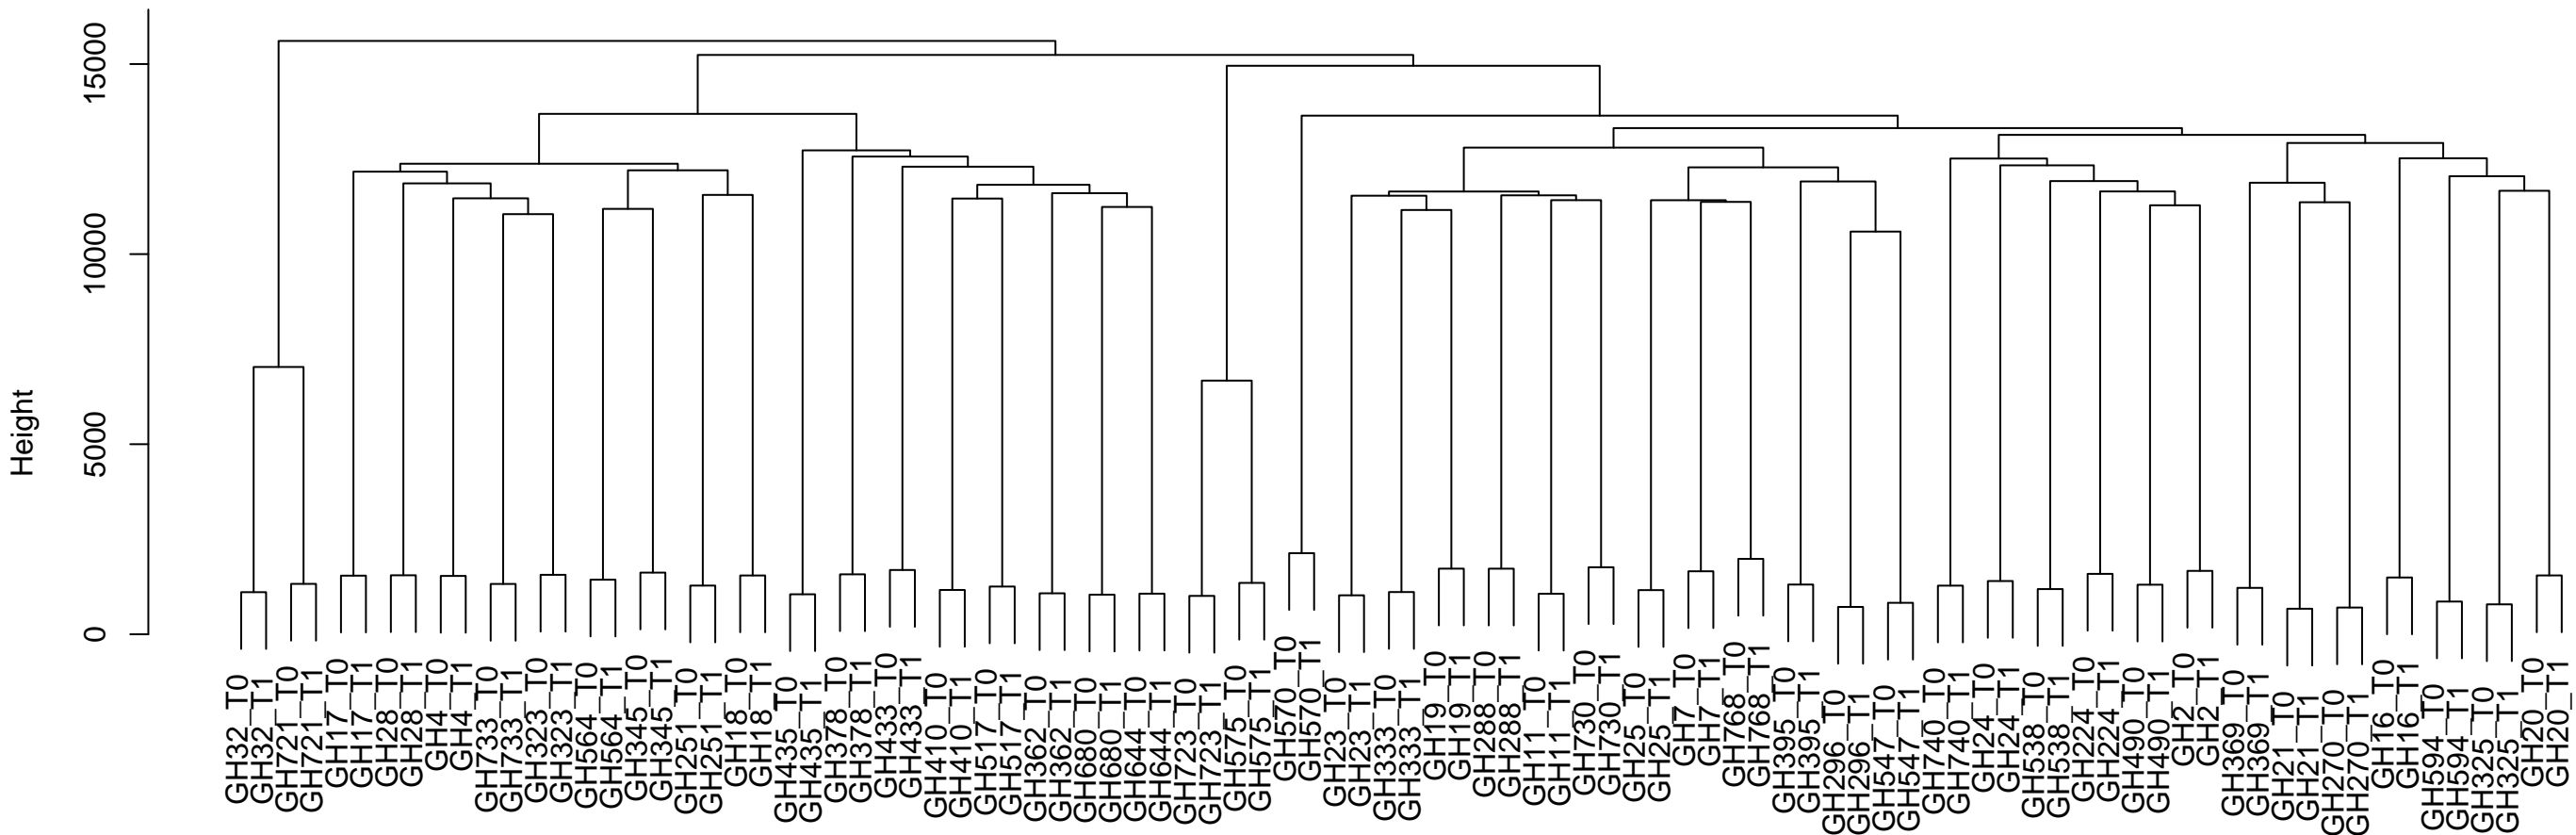

dist\_snp\_manh  
hclust (\*, "ward.D2")
